# Supplementary material for: Review of One Health in the Galápagos Islands (Part 1): Historical Perspective, Invasive Species, and Emerging Infectious Diseases
Source: Preprints.org preprint supplement (doi:10.20944/preprints202311.0775.v1), 2023-11-13
Supplement: Supplementary file 2 [file supplementary]

## Sheet: Key
IUCN Threatened Categories - pre-1994		Definition
Threatened Species	T	Encompasses all the below categories
Endangered	E	"Taxa in danger of extinction and whose survival is unlikely if the causal factors continue operating."
Vulnerable	V	"Taxa believed likely to move into the 'Endangered' category in the near future if the causal factors continue operating."
Rare	R	"Taxa with small world populations that are not at present 'Endangered' or 'Vulnerable', but are at risk.
Indeterminate	I	"Taxa known to be 'Endangered', 'Vulnerable' or 'Rare' but where there is not enough information to say which of the three categories is appropriate."
Insufficiently Known	K	"Taxa that are suspected but not definitely known to belong to any of the above categories, because of lack of information."
Extinct	Ex	"Species not definitely located in the wild during the past 50 years."
Commercially Threatened	CT	"Taxa not currently threatened with extinction, but most or all of whose populations are threatened as a sustainable commercial resource, or will become so, unless their exploitation is regulated."
Reference: 1994 IUCN Red List of Threatened Animals
IUCN Threatened Categories: post-1994
Extinct	EX
Extinct in the Wild	EW
Critically Endangered	CR
Endangered	EN
Vulnerable	VU
Near Threatened	NT
Least Concern	LC
Data Deficient	DD
https://portals.iucn.org/library/sites/library/files/documents/RL-2001-001-2nd.pdf

## Sheet: Mammals
Scientific name	Common name	First described	Origin	IUCN Assessment Year
				1994	1996	2000	2002	2003	2004	2005	2006	2007	2008	2009	2010	2011	2012	2013	2014	2015	2016	2017	2018	2019	2020	2021		IUCN CITATION - accessed May 8 2023
Arctocephalus galapagoensis	Galápagos fur seal	1904	Endemic		VU								EN						EN									Trillmich, F. 2015. Arctocephalus galapagoensis. The IUCN Red List of Threatened Species 2015: e.T2057A45223722. http://dx.doi.org/10.2305/IUCN.UK.2015-2.RLTS.T2057A45223722.en
Zalophus wollebaeki	Galápagos sea lion	1953	Endemic		VU								EN						EN									Trillmich, F. 2015. Zalophus wollebaeki. The IUCN Red List of Threatened Species 2015: e.T41668A45230540. http://dx.doi.org/10.2305/IUCN.UK.2015-2.RLTS.T41668A45230540.en
Aegialomys galapagoensis	Galápagos rice rat	1839	Endemic		CR		VU						VU										VU					Weksler, M. 2018. Aegialomys galapagoensis. The IUCN Red List of Threatened Species 2018: e.T15595A22336232. http://dx.doi.org/10.2305/IUCN.UK.2018-1.RLTS.T15595A22336232.en
Nesoryzomys fernandinae	Fernandina rice rat	1979	Endemic		EX	VU							VU									VU						Dowler, R. & Weksler, M. 2018. Nesoryzomys fernandinae. The IUCN Red List of Threatened Species 2018: e.T14707A22390507. http://dx.doi.org/10.2305/IUCN.UK.2018- 1.RLTS.T14707A22390507.en
Nesoryzomys narboroughi	Small Fernandina rice rat	1904	Endemic				NT						VU									VU						Dowler, R. & Weksler, M. 2018. Nesoryzomys narboroughi. The IUCN Red List of Threatened Species 2018: e.T40765A22390714. http://dx.doi.org/10.2305/IUCN.UK.2018- 1.RLTS.T40765A22390714.en
Balaenoptera borealis	Sei whale	1828	Native	VU	EN								EN										EN					Cooke, J.G. 2018. Balaenoptera borealis. The IUCN Red List of Threatened Species 2018: e.T2475A130482064. http://dx.doi.org/10.2305/IUCN.UK.2018-2.RLTS.T2475A130482064.en
Balaenoptera physalus	Fin whale	1758	Native	VU	EN								EN					EN					VU					Cooke, J.G. 2018. Balaenoptera physalus. The IUCN Red List of Threatened Species 2018: e.T2478A50349982. http://dx.doi.org/10.2305/IUCN.UK.2018-2.RLTS.T2478A50349982.en
Balaenoptera musculus	Blue whale	1758	Migrant	EN	EN								EN										EN					Cooke, J.G. 2018. Balaenoptera musculus (errata version published in 2019). The IUCN Red List of Threatened Species 2018: e.T2477A156923585. http://dx.doi.org/10.2305/IUCN.UK.2018- 2.RLTS.T2477A156923585.en
Balaenoptera musculus ssp. intermedia	Antarctic blue whale	1871	Migrant		EN								CR										CR					Cooke, J.G. 2018. Balaenoptera musculus ssp. intermedia. The IUCN Red List of Threatened Species 2018: e.T41713A50226962. http://dx.doi.org/10.2305/IUCN.UK.2018- 2.RLTS.T41713A50226962.en
Lasiurus borealis brachyotis	Galapagos red bat	1998	Endemic																									No IUCN listing; https://www.darwinfoundation.org/en/datazone/checklist?species=5220
Aeorestes villosissimus villosissimus / Lasiurus cinereus	Hoary bat	1806	Native		LC								LC							LC								Gonzalez, E., Barquez, R. & Arroyo-Cabrales, J. 2016. Lasiurus cinereus. The IUCN Red List of Threatened Species 2016: e.T11345A22120305. https://dx.doi.org/10.2305/IUCN.UK.2016-1.RLTS.T11345A22120305.en. Accessed on 01 November 2023.
IUCN status is indicated by the color of the box. Letters are given in each year that the species was re-assessed by the IUCN.
If the species had not yet been assessed by the IUCN, a white box is given.
For instance, the Galápagos fur seal was first assessed as Vulnerable in 1996, and then was next assessed in 2008 as Endangered.

## Sheet: Reptiles
Scientific name	Common name	First described	Origin	IUCN Assessment Year
				1994	1996	2000	2002	2003	2004	2005	2006	2007	2008	2009	2010	2011	2012	2013	2014	2015	2016	2017	2018	2019	2020	2021		IUCN CITATION - accessed May 8 2023
Chelonoidis becki	Volcán Wolf giant tortoise	1901	Endemic		VU																VU							Caccone, A., Cayot, L.J., Gibbs, J.P. & Tapia, W. 2017. Chelonoidis becki. The IUCN Red List of Threatened Species 2017: e.T9018A82426296. http://dx.doi.org/10.2305/IUCN.UK.2017- 3.RLTS.T9018A82426296.en
Chelonoidis chathamensis	San Cristóbal giant tortoise	1907	Endemic		VU																	EN						Caccone, A., Cayot, L.J., Gibbs, J.P. & Tapia, W. 2017. Chelonoidis chathamensis. The IUCN Red List of Threatened Species 2017: e.T9019A82688009. http://dx.doi.org/10.2305/IUCN.UK.2017- 3.RLTS.T9019A82688009.en
Chelonoidis darwini	Santiago giant tortoise	1907	Endemic		EN															CR								Cayot, L.J., Gibbs, J.P., Tapia, W. & Caccone, A. 2022. Chelonoidis darwini (amended version of 2016 assessment). The IUCN Red List of Threatened Species 2022: e.T9020A217759496. https://dx.doi.org/10.2305/IUCN.UK.2022-1.RLTS.T9020A217759496.en
Chelonoidis donfaustoi	Eastern Santa Cruz giant tortoise	1903	Endemic		EN															CR								Cayot, L.J., Gibbs, J.P., Tapia, W. & Caccone, A. 2017. Chelonoidis donfaustoi. The IUCN Red List of Threatened Species 2017: e.T90377132A90377135. http://dx.doi.org/10.2305/IUCN.UK.2017-3.RLTS.T90377132A90377135.en
Chelonoidis duncanensis	Pinzón giant tortoise	1896	Endemic		EW							EW								VU								Cayot, L.J., Gibbs, J.P., Tapia, W. & Caccone, A. 2017. Chelonoidis duncanensis. The IUCN Red List of Threatened Species 2017: e.T9021A3149054. http://dx.doi.org/10.2305/IUCN.UK.2017- 3.RLTS.T9021A3149054.en
Chelonoidis guntheri	Sierra Negra giant tortoise	1889	Endemic		EN															CR								Cayot, L.J., Gibbs, J.P., Tapia, W. & Caccone, A. 2018. Chelonoidis guntheri. The IUCN Red List of Threatened Species 2018: e.T9022A116505802. http://dx.doi.org/10.2305/IUCN.UK.2018- 2.RLTS.T9022A116505802.en
Chelonoidis hoodensis	Española giant tortoise	1907	Endemic		CR															CR								Cayot, L.J., Gibbs, J.P., Tapia, W. & Caccone, A. 2017. Chelonoidis hoodensis. The IUCN Red List of Threatened Species 2017: e.T9024A82777079. http://dx.doi.org/10.2305/IUCN.UK.2017- 3.RLTS.T9024A82777079.en
Chelonoidis microphyes	Volcán Darwin giant tortoise	1875	Endemic		VU																EN							Cayot, L.J., Gibbs, J.P., Tapia, W. & Caccone, A. 2018. Chelonoidis microphyes. The IUCN Red List of Threatened Species 2018: e.T9025A116506297. http://dx.doi.org/10.2305/IUCN.UK.2018- 2.RLTS.T9025A116506297.en
Chelonoidis phantasticus	Fernandina giant tortoise	1907	Endemic																	CR								Rhodin, A.G.J., Gibbs, J.P., Cayot, L.J., Kiester, A.R. & Tapia, W. 2017. Chelonoidis phantasticus (errata version published in 2018). The IUCN Red List of Threatened Species 2017: e.T170517A128969920. http://dx.doi.org/10.2305/IUCN.UK.2017-3.RLTS.T170517A1315907.en
Chelonoidis porteri	Western Santa Cruz giant tortoise	1903	Endemic		EN																CR							Cayot, L.J., Gibbs, J.P., Tapia, W. & Caccone, A. 2017. Chelonoidis porteri. The IUCN Red List of Threatened Species 2017: e.T9026A82777132. http://dx.doi.org/10.2305/IUCN.UK.2017- 3.RLTS.T9026A82777132.en
Chelonoidis vandenburghi	Volcán Alcedo giant tortoise	1930	Endemic		VU																VU							Cayot, L.J., Gibbs, J.P., Tapia, W. & Caccone, A. 2018. Chelonoidis vandenburghi (errata version published in 2019). The IUCN Red List of Threatened Species 2018: e.T9027A144766471. http://dx.doi.org/10.2305/IUCN.UK.2018-2.RLTS.T9027A144766471.en
Chelonoidis vicina	Cerro Azul giant tortoise	1875	Endemic		EN																EN							Cayot, L.J., Gibbs, J.P., Tapia, W. & Caccone, A. 2018. Chelonoidis vicina (errata version published in 2019). The IUCN Red List of Threatened Species 2018: e.T9028A144765855. http://dx.doi.org/10.2305/IUCN.UK.2018-2.RLTS.T9028A144765855.en
Amblyrhynchus cristatus ssp. cristatus	Isabela and Fernandina iguana	1825	Endemic	NT	VU				VU															VU				MacLeod, A., Nelson, K.N. & Grant, T.D. 2020. Amblyrhynchus cristatus (errata version published in 2020). The IUCN Red List of Threatened Species 2020: e.T1086A177552193. https://dx.doi.org/10.2305/IUCN.UK.2020-2.RLTS.T1086A177552193.en
Amblyrhynchus cristatus ssp. trillmichi	Santa Fé marine iguana	2017	Endemic																					CR				MacLeod, A., Nelson, K.N. & Grant, T.D. 2020. Amblyrhynchus cristatus ssp. trillmichi (errata version published in 2020). The IUCN Red List of Threatened Species 2020: e.T152331440A177568544. https://dx.doi.org/10.2305/IUCN.UK.2020- 2.RLTS.T152331440A177568544.en
Amblyrhynchus cristatus ssp. hayampi	Marchena marine iguana	2017	Endemic																					EN				MacLeod, A., Nelson, K.N. & Grant, T.D. 2020. Amblyrhynchus cristatus ssp. hayampi (errata version published in 2020). The IUCN Red List of Threatened Species 2020: e.T152331100A177568097. https://dx.doi.org/10.2305/IUCN.UK.2020- 2.RLTS.T152331100A177568097.en
Amblyrhynchus cristatus ssp. hassi	Santa Cruz marine iguana	1962	Endemic																					EN				MacLeod, A., Nelson, K.N. & Grant, T.D. 2020. Amblyrhynchus cristatus ssp. hassi (errata version published in 2020). The IUCN Red List of Threatened Species 2020: e.T44175A177564513. https://dx.doi.org/10.2305/IUCN.UK.2020-2.RLTS.T44175A177564513.en
Amblyrhynchus cristatus ssp. jeffreysi	Wolf marine iguana	2017	Endemic																					EN				MacLeod, A., Nelson, K.N. & Grant, T.D. 2020. Amblyrhynchus cristatus ssp. jeffreysi (errata version published in 2020). The IUCN Red List of Threatened Species 2020: e.T152331073A177567657. https://dx.doi.org/10.2305/IUCN.UK.2020- 2.RLTS.T152331073A177567657.en
Amblyrhynchus cristatus ssp. godzilla	Punta Pitt marine iguana	2017	Endemic																					CR				MacLeod, A., Nelson, K.N. & Grant, T.D. 2020. Amblyrhynchus cristatus ssp. godzilla (errata version published in 2020). The IUCN Red List of Threatened Species 2020: e.T152330878A177567061. https://dx.doi.org/10.2305/IUCN.UK.2020- 2.RLTS.T152330878A177567061.en
Amblyrhynchus cristatus ssp. sielmanni	Pinta marine iguana	1962	Endemic																					CR				MacLeod, A., Nelson, K.N. & Grant, T.D. 2020. Amblyrhynchus cristatus ssp. sielmanni (errata version published in 2020). The IUCN Red List of Threatened Species 2020: e.T44178A177566053. https://dx.doi.org/10.2305/IUCN.UK.2020-2.RLTS.T44178A177566053.en
Amblyrhynchus cristatus ssp. wikelskii	Santiago marine iguana	2017	Endemic																					EN				MacLeod, A., Nelson, K.N. & Grant, T.D. 2020. Amblyrhynchus cristatus ssp. wikelskii (errata version published in 2020). The IUCN Red List of Threatened Species 2020: e.T152331459A177569043. https://dx.doi.org/10.2305/IUCN.UK.2020- 2.RLTS.T152331459A177569043.en
Amblyrhynchus cristatus ssp. venustissimus	Española marine iguana	1956	Endemic																					EN				MacLeod, A., Nelson, K.N. & Grant, T.D. 2020. Amblyrhynchus cristatus ssp. venustissimus (errata version published in 2020). The IUCN Red List of Threatened Species 2020: e.T175537718A177566513. https://dx.doi.org/10.2305/IUCN.UK.2020- 2.RLTS.T175537718A177566513.en
Amblyrhynchus cristatus ssp. nanus	Genovesa marine iguana	1892	Endemic																					CR				MacLeod, A., Nelson, K.N. & Grant, T.D. 2020. Amblyrhynchus cristatus ssp. nanus (errata version published in 2020). The IUCN Red List of Threatened Species 2020: e.T44177A177565612. https://dx.doi.org/10.2305/IUCN.UK.2020-2.RLTS.T44177A177565612.en
Amblyrhynchus cristatus ssp. mertensi	San Cristóbal marine iguana	1962	Endemic																					EN				MacLeod, A., Nelson, K.N. & Grant, T.D. 2020. Amblyrhynchus cristatus ssp. mertensi (errata version published in 2020). The IUCN Red List of Threatened Species 2020: e.T152329949A177565047. https://dx.doi.org/10.2305/IUCN.UK.2020- 2.RLTS.T152329949A177565047.en
Conolophus marthae	Galápagos pink land iguana	1986	Endemic														CR											Gentile, G. 2012. Conolophus marthae. The IUCN Red List of Threatened Species 2012: e.T174472A1414375. http://dx.doi.org/10.2305/IUCN.UK.2012-1.RLTS.T174472A1414375.en
Conolophus pallidus	Santa Fe land iguana	1903	Endemic	NT	VU																			VU				Gentile, G. & Grant, T.D. 2020. Conolophus pallidus. The IUCN Red List of Threatened Species 2020: e.T5239A3014028. https://dx.doi.org/10.2305/IUCN.UK.2020- 2.RLTS.T5239A3014028.en
Conolophus subcristatus	Galápagos land iguana	1831	Endemic	VU	VU																			VU				Kumar, K., Gentile, G. & Grant, T.D. 2020. Conolophus subcristatus. The IUCN Red List of Threatened Species 2020: e.T5240A3014082. https://dx.doi.org/10.2305/IUCN.UK.2020- 2.RLTS.T5240A3014082.en
Microlophus bivittatus	San Cristóbal lava lizard	1871	Endemic																NT									Márquez, C. & Cisneros-Heredia, D.F. 2022. Microlophus bivittatus (amended version of 2016 assessment). The IUCN Red List of Threatened Species 2022: e.T48444538A217809016. https://dx.doi.org/10.2305/IUCN.UK.2022-1.RLTS.T48444538A217809016.en
Microlophus duncanensis	Pinzón lava lizard	1890	Endemic																		NT							Márquez, C. & Cisneros-Heredia, D.F. 2016. Microlophus duncanensis. The IUCN Red List of Threatened Species 2016: e.T48444650A48444714. http://dx.doi.org/10.2305/IUCN.UK.2016- 1.RLTS.T48444650A48444714.en
Microlophus grayii	Floreana lava lizard	1843	Endemic																NT									Márquez, C. & Cisneros-Heredia, D.F. 2016. Microlophus grayii. The IUCN Red List of Threatened Species 2016: e.T48444750A48444762. http://dx.doi.org/10.2305/IUCN.UK.2016- 1.RLTS.T48444750A48444762.en
Phyllodactylus darwini	Darwin's leaf-toed gecko	1942	Endemic																NT									Márquez, C., Yánez-Muñoz, M. & Cisneros-Heredia, D.F. 2022. Phyllodactylus darwini (amended version of 2016 assessment). The IUCN Red List of Threatened Species 2022: e.T48443561A217808624. https://dx.doi.org/10.2305/IUCN.UK.2022- 1.RLTS.T48443561A217808624.en
Phyllodactylus galapagensis	Galápagos leaf-toed gecko	1869	Endemic																NT									Márquez, C., Yánez-Muñoz, M. & Cisneros-Heredia, D.F. 2016. Phyllodactylus galapagensis. The IUCN Red List of Threatened Species 2016: e.T48443616A48443620. http://dx.doi.org/10.2305/IUCN.UK.2016-1.RLTS.T48443616A48443620.en
Phyllodactylus leei	San Cristóbal Island Leaf-toed Gecko	1889	Endemic												VU				NT									Cisneros-Heredia, D.F. & Márquez, C. 2016. Phyllodactylus leei. The IUCN Red List of Threatened Species 2016: e.T178276A56282962. http://dx.doi.org/10.2305/IUCN.UK.2016- 1.RLTS.T178276A56282962.en
Pseudalsophis biserialis	Galápagos racer	1860	Endemic																NT									Márquez, C., Cisneros-Heredia, D.F. & Yánez-Muñoz, M. 2017. Pseudalsophis biserialis. The IUCN Red List of Threatened Species 2017: e.T190541A56253872. http://dx.doi.org/10.2305/IUCN.UK.2017-2.RLTS.T190541A56253872.en
Pseudalsophis hoodensis	Española racer	1912	Endemic																NT									Cisneros-Heredia, D.F. & Márquez, C. 2017. Pseudalsophis hoodensis. The IUCN Red List of Threatened Species 2017: e.T190539A54447664. http://dx.doi.org/10.2305/IUCN.UK.2017- 2.RLTS.T190539A54447664.en
Pseudalsophis slevini	Banded Galápagos snake	1912	Endemic																VU									Márquez, C. & Cisneros-Heredia, D.F. 2019. Pseudalsophis slevini. The IUCN Red List of Threatened Species 2019: e.T190543A54447674. https://dx.doi.org/10.2305/IUCN.UK.2019- 3.RLTS.T190543A54447674.en
Pseudalsophis steindachneri	Striped Galápagos snake	1912	Endemic																NT									Cisneros-Heredia, D.F. & Márquez, C. 2017. Pseudalsophis steindachneri. The IUCN Red List of Threatened Species 2017: e.T190542A54447669. http://dx.doi.org/10.2305/IUCN.UK.2017- 2.RLTS.T190542A54447669.en
Caretta caretta	Loggerhead sea turtle	1758	Native	VU	EN															VU								Casale, P. & Tucker, A.D. 2017. Caretta caretta. The IUCN Red List of Threatened Species 2017: e.T3897A119333622. http://dx.doi.org/10.2305/IUCN.UK.2017-2.RLTS.T3897A119333622.en
Chelonia mydas	East Pacific green turtle	1758	Native	EN	EN				EN																			Seminoff, J.A. (Southwest Fisheries Science Center, U.S.). 2004. Chelonia mydas. The IUCN Red List of Threatened Species 2004: e.T4615A11037468. http://dx.doi.org/10.2305/IUCN.UK.2004.RLTS.T4615A11037468.en
Dermochelys coriacea	Leatherback turtle	1761	Migrant	EN	EN	CR												VU										Wallace, B.P., Tiwari, M. & Girondot, M. 2013. Dermochelys coriacea. The IUCN Red List of Threatened Species 2013: e.T6494A43526147. http://dx.doi.org/10.2305/IUCN.UK.2013- 2.RLTS.T6494A43526147.en
Eretmochelys imbricata	Hawksbill turtle	1766	Migrant	EN	CR								CR															Mortimer, J.A & Donnelly, M. (IUCN SSC Marine Turtle Specialist Group). 2008. Eretmochelys imbricata. The IUCN Red List of Threatened Species 2008: e.T8005A12881238. http://dx.doi.org/10.2305/IUCN.UK.2008.RLTS.T8005A12881238.en
Lepidochelys olivacea	Olive Ridley turtle	1829	Migrant	EN	EN								VU															Abreu-Grobois, A & Plotkin, P. (IUCN SSC Marine Turtle Specialist Group). 2008. Lepidochelys olivacea. The IUCN Red List of Threatened Species 2008: e.T11534A3292503. http://dx.doi.org/10.2305/IUCN.UK.2008.RLTS.T11534A3292503.en
Podocnemis unifilis	Yellow-spotted river turtle	1848	Introduced	VU	VU																							Tortoise & Freshwater Turtle Specialist Group. 1996. Podocnemis unifilis. The IUCN Red List of Threatened Species 1996: e.T17825A97397562. http://dx.doi.org/10.2305/IUCN.UK.1996.RLTS.T17825A7506933.en
*pre-1994 classification
Figure 2: Threatened, Critically Endangered, Endangered, Vulnerable) and Near-Threatened Species of the Galápagos Islands
Abbreviations
EX	Extinct
EW	Extinct in the Wild
CR	Critically Endangered
EN	Endangered
VU	Vulnerable
NT	Near Threatened [Rare*]
LC	Least Concern
K	[Insufficiently Known*]
U	Unknown
NR	Not Recognized
OD	Out of Danger

## Sheet: Birds
Scientific name	Common name	First described	Origin	IUCN Assessment Year
				1994	1996	2000	2002	2003	2004	2005	2006	2007	2008	2009	2010	2011	2012	2013	2014	2015	2016	2017	2018	2019	2020	2021		IUCN CITATION - accessed May 8 2023
Buteo galapagoensis	Galápagos hawk	1837	Endemic	VU	VU	VU			VU		VU		VU				VU				VU					VU		BirdLife International. 2021. Buteo galapagoensis. The IUCN Red List of Threatened Species 2021: e.T22695909A194428673. https://dx.doi.org/10.2305/IUCN.UK.2021- 3.RLTS.T22695909A194428673.en
Certhidea olivacea	Green warbler finch	1837	Endemic																		LC	VU						BirdLife International. 2017. Certhidea olivacea. The IUCN Red List of Threatened Species 2017: e.T103814223A119095821. http://dx.doi.org/10.2305/IUCN.UK.2017- 3.RLTS.T103814223A119095821.en
Geospiza heliobates	Mangrove finch	1901	Endemic	EN	EN	CR			CR				CR	CR	CR		CR	CR		CR	CR		CR			CR		BirdLife International. 2021. Geospiza heliobates. The IUCN Red List of Threatened Species 2021: e.T22723786A182523098. https://dx.doi.org/10.2305/IUCN.UK.2021- 3.RLTS.T22723786A182523098.en
Geospiza acutirostris	Genovesa ground finch	1894	Endemic																		VU	VU			VU			BirdLife International. 2020. Geospiza acutirostris. The IUCN Red List of Threatened Species 2020: e.T103815404A182443041. https://dx.doi.org/10.2305/IUCN.UK.2020- 3.RLTS.T103815404A182443041.en
Geospiza conirostris	Española cactus finch	1890	Endemic																		VU	VU			VU			BirdLife International. 2020. Geospiza conirostris. The IUCN Red List of Threatened Species 2020: e.T103815509A182514440. https://dx.doi.org/10.2305/IUCN.UK.2020- 3.RLTS.T103815509A182514440.en
Geospiza pallida	Woodpecker finch	1870	Endemic	U		U			LC				LC	LC			LC			VU	VU					NT		BirdLife International. 2021. Geospiza pallida. The IUCN Red List of Threatened Species 2021: e.T22723783A167283265. https://dx.doi.org/10.2305/IUCN.UK.2021- 3.RLTS.T22723783A167283265.en
Geospiza pauper	Medium tree finch	1890	Endemic	U		VU			VU				VU	VU	VU		VU	VU		VU	VU		CR					BirdLife International. 2018. Geospiza pauper. The IUCN Red List of Threatened Species 2018: e.T22723773A130488958. http://dx.doi.org/10.2305/IUCN.UK.2018- 2.RLTS.T22723773A130488958.en
Geospiza propinqua	Genovesa cactus finch	1894	Endemic																		VU	VU			VU			BirdLife International. 2020. Geospiza propinqua. The IUCN Red List of Threatened Species 2020: e.T103815544A182516621. https://dx.doi.org/10.2305/IUCN.UK.2020- 3.RLTS.T103815544A182516621.en
Geospiza psittacula	Large tree finch	1837	Endemic	U		U			LC				LC	LC			LC			VU	VU				VU			BirdLife International. 2021. Geospiza psittacula. The IUCN Red List of Threatened Species 2021: e.T22723768A182382400. https://dx.doi.org/10.2305/IUCN.UK.2021- 3.RLTS.T22723768A182382400.en
Geospiza septentrionalis	Vampire ground finch	1899	Endemic																		VU	VU				VU		BirdLife International. 2022. Geospiza septentrionalis. The IUCN Red List of Threatened Species 2022: e.T103815245A182414024. https://dx.doi.org/10.2305/IUCN.UK.2022- 1.RLTS.T103815245A182414024.en
Larus fuliginosus	Lava gull	1841	Endemic	VU	VU	VU			VU		VU		VU		VU		VU				VU		VU					BirdLife International. 2018. Larus fuliginosus. The IUCN Red List of Threatened Species 2018: e.T22694452A132552501. http://dx.doi.org/10.2305/IUCN.UK.2018- 2.RLTS.T22694452A132552501.en
Laterallus spilonota	Galápagos rail	1841	Endemic	U		VU			VU		VU		VU				VU		VU		VU				VU			BirdLife International. 2020. Laterallus spilonota. The IUCN Red List of Threatened Species 2020: e.T22692366A181476400. https://dx.doi.org/10.2305/IUCN.UK.2020- 3.RLTS.T22692366A181476400.en
Mimus macdonaldi	Española Mockingbird	1890	Endemic	U		VU			VU			VU	VU				VU				VU				VU			BirdLife International. 2020. Mimus macdonaldi. The IUCN Red List of Threatened Species 2020: e.T22711070A182738354. https://dx.doi.org/10.2305/IUCN.UK.2020- 3.RLTS.T22711070A182738354.en
Mimus melanotis	San Cristóbal mockingbird	1837	Endemic	U		U			LC		EN		EN				EN	EN			EN				NT			BirdLife International. 2020. Mimus melanotis. The IUCN Red List of Threatened Species 2020: e.T22711078A180990415. https://dx.doi.org/10.2305/IUCN.UK.2020- 3.RLTS.T22711078A180990415.en
Mimus trifasciatus	Floreana mockingbird	1837	Endemic	EN	EN	EN			EN				CR	CR	CR		CR	CR		CR	CR	EN	EN					BirdLife International. 2018. Mimus trifasciatus. The IUCN Red List of Threatened Species 2018: e.T22711063A132093428. http://dx.doi.org/10.2305/IUCN.UK.2018- 2.RLTS.T22711063A132093428.en
Nannopterum harrisi	Flightless cormorant	1898	Endemic	VU	VU	EN			EN	EN			EN		EN	VU	VU	VU			VU	VU	VU					BirdLife International. 2018. Nannopterum harrisi. The IUCN Red List of Threatened Species 2018: e.T22696756A133546087. Accessed on 09 May 2023.
Phoebastria irrorata	Waved albatross	1883	Endemic	U		VU		VU	VU	VU		CR	CR	CR	CR		CR	CR	CR	CR	CR	CR	CR					BirdLife International. 2018. Phoebastria irrorata. The IUCN Red List of Threatened Species 2018: e.T22698320A132641638. http://dx.doi.org/10.2305/IUCN.UK.2018- 2.RLTS.T22698320A132641638.en
Progne modesta	Galápagos martin	1837	Endemic	NR		NR			NR	VU			VU				EN				EN				EN			BirdLife International. 2020. Progne modesta. The IUCN Red List of Threatened Species 2020: e.T22731986A182672786. https://dx.doi.org/10.2305/IUCN.UK.2020- 3.RLTS.T22731986A182672786.en
Pterodroma phaeopygia	Galápagos petrel	1876	Endemic	CR	CR	CR			CR		CR	CR	CR	CR	CR	CR	CR	CR		CR	CR	CR	CR					BirdLife International. 2018. Pterodroma phaeopygia. The IUCN Red List of Threatened Species 2018: e.T22698020A132619647. http://dx.doi.org/10.2305/IUCN.UK.2018- 2.RLTS.T22698020A132619647.en
Pyrocephalus nanus	Little Vermilion Flycatcher	1838	Endemic																		VU							BirdLife International. 2017. Pyrocephalus nanus. The IUCN Red List of Threatened Species 2017: e.T103682926A119555197. http://dx.doi.org/10.2305/IUCN.UK.2017- 3.RLTS.T103682926A119555197.en
Spheniscus mendiculus	Galápagos penguin	1871	Endemic	VU	VU	EN			EN			EN	EN		EN		EN				EN		EN		EN			BirdLife International. 2020. Spheniscus mendiculus. The IUCN Red List of Threatened Species 2020: e.T22697825A182729677. https://dx.doi.org/10.2305/IUCN.UK.2020- 3.RLTS.T22697825A182729677.en
Zenaida galapagoensis	Galápagos dove	1841	Endemic	U		U			LC				LC	LC			LC				LC				NT			BirdLife International. 2020. Zenaida galapagoensis. The IUCN Red List of Threatened Species 2020: e.T22690758A157400314. https://dx.doi.org/10.2305/IUCN.UK.2020- 3.RLTS.T22690758A157400314.en
Ardenna grisea	Sooty shearwater	1789	Vagrant	U		U			NT				NT		NT		NT				NT	NT	NT	NT				BirdLife International. 2019. Ardenna grisea. The IUCN Red List of Threatened Species 2019: e.T22698209A154440143. https://dx.doi.org/10.2305/IUCN.UK.2019- 3.RLTS.T22698209A154440143.en
Hydrobates leucorhous	Leach's Storm-petrel	1818	Vagrant																				VU					BirdLife International. 2018. Hydrobates leucorhous. The IUCN Red List of Threatened Species 2018: e.T132438298A132438484. https://dx.doi.org/10.2305/IUCN.UK.2018-2.RLTS.T132438298A132438484.en. Accessed on 11 June 2023.
Procellaria parkinsoni	Black petrel	1862	Vagrant	VU	VU	VU			VU	VU		VU	VU		VU		VU				VU	VU						BirdLife International. 2018. Procellaria parkinsoni. The IUCN Red List of Threatened Species 2018: e.T22698150A132629374. http://dx.doi.org/10.2305/IUCN.UK.2018- 2.RLTS.T22698150A132629374.en
*Endemic subspecies recognized by CDF and local populations may be threatened but not reflected by IUCN Red List.
*pre-1994 classification
Figure 2: Threatened, Critically Endangered, Endangered, Vulnerable) and Near-Threatened Species of the Galápagos Islands
Abbreviations
EX	Extinct
EW	Extinct in the Wild
CR	Critically Endangered
EN	Endangered
VU	Vulnerable
NT	Near Threatened [Rare*]
LC	Least Concern
K	[Insufficiently Known*]
U	Unknown
NR	Not Recognized
OD	Out of Danger
Started trying to include every species and gave up
Asio flammeus	Short-eared owl*	1763	Native	U		U			LC				LC	LC			LC			LC	LC					LC
Pelecanus occidentalis	Brown pelican	1884	Native	LC		LC			LC		NR		LC	LC			LC				LC		LC
Phaethon aethereus	Red-billed tropicbird	1758	Native	U		U			LC				LC	LC			LC	LC			LC		LC	LC
Ardea alba	Great white egret	1758	Native	U		U			LC				LC	LC			LC				LC
Phoenicopterus ruber	American flamingo	1758	Native	NR		NR			LC				LC	LC			LC				LC		LC
Hydrobates castro	Band-rumped storm petrel	1851	Native																				LC
Sula nebouxii	Blue-footed booby*	1882	Native	U		U			LC				LC	LC			LC						LC		LC
Bubulcus ibis	Cattle egret	1758	Introduced	U		U			LC				LC	LC			LC		LC		LC
Ardea herodias	Great blue heron*	1758	Native																						LC
Fregata magnificens	Magnificent frigatebird	1914	Native	U		U			LC				LC	LC			LC				LC	LC	LC		LC
Nyctanassa violacea	Yellow-crowned night heron*	1758	Native	U		U			LC				LC	LC			LC				LC		LC
Oceanites gracilis	White-vented storm petrel*	1859	Native	DD	DD	DD			DD				DD		DD		DD				DD		DD
Sula dactylatra	Masked booby	1831	Native	NR		NR			NR				NR		LC		LC				LC		LC
Crotophaga ani	Smooth-billed ani	1758	Introduced	U		U			LC				LC	LC			LC				LC		LC		LC
Daption capense	Cape petrel	1758	Vagrant	U		U			LC				LC	LC			LC				LC	LC	LC
Sula sula	Red-footed booby	1766	Native	U		U			LC				LC	LC			LC				LC		LC		LC
Podilymbus podiceps	Pied-billed Grebe	1758	Migrant	U		U			LC				LC	LC			LC				LC				LC
Fregata minor	Great Frigatebird	1789	Native	U		U			LC				LC	LC			LC				LC	LC	LC		LC
Dendrocygna autumnalis	Black-bellied Whistling-duck	1758	Vagrant	U		U			LC				LC	LC			LC				LC	LC	LC		LC
Hydrobates tethys	Wedge-rumped Storm-petrel*	1852	Native	U		U			LC				LC	LC			LC	LC			LC		LC
Spatula discors	Blue-winged Teal	1766	Migrant	U		U			LC				LC	LC			LC				LC				LC
